# Supplementary material for: A highly selective coumarin-based chemosensor for dual sensing of Cu2+ and Zn2+ ions with logic gate integration and live cell imaging
Source: Royal Society of Chemistry journal article supplement (doi:10.1039/d4ay00594e), 2024-01-01
Supplement: d4ay00594e1.pdf [file d4ay00594e1.pdf]

## Electronic Supplementary Information (ESI)

### A highly selective coumarin-based chemosensor for dual sensing of Cu<sup>2+</sup> and Zn<sup>2+</sup> ions with logic gate integration and live cell imaging

Avanish Kumar Singh<sup>a</sup>, Amit Kumar Singh<sup>a</sup>, Sashikant Sharma<sup>b</sup>, Vijay Kumar Sonkar<sup>b</sup> and V. P. Singh<sup>\*a</sup>

<sup>a</sup> Department of Chemistry, Institute of Science, Banaras Hindu University, Varanasi-221005 (India)

<sup>b</sup> Department of Molecular and Human Genetics, Institute of Science, Banaras Hindu University, Varanasi-221005 (India)

### Table of Contents

|                | Methods and measurements                                                                                                                                                                                                                                                                                                                                                                                                                                                                                                                                                                          | S3-S4     |
|----------------|---------------------------------------------------------------------------------------------------------------------------------------------------------------------------------------------------------------------------------------------------------------------------------------------------------------------------------------------------------------------------------------------------------------------------------------------------------------------------------------------------------------------------------------------------------------------------------------------------|-----------|
| <b>Fig. S1</b> | IR spectrum of <b>CIH</b>                                                                                                                                                                                                                                                                                                                                                                                                                                                                                                                                                                         | <b>S4</b> |
| <b>Fig. S2</b> | <sup>1</sup> H NMR spectrum of <b>CIH</b> .                                                                                                                                                                                                                                                                                                                                                                                                                                                                                                                                                       | <b>S5</b> |
| <b>Fig. S3</b> | <sup>13</sup> C NMR spectrum of <b>CIH</b> .                                                                                                                                                                                                                                                                                                                                                                                                                                                                                                                                                      | <b>S5</b> |
| <b>Fig. S4</b> | Mass spectrum of <b>CIH</b> .                                                                                                                                                                                                                                                                                                                                                                                                                                                                                                                                                                     | <b>S6</b> |
| <b>Fig. S5</b> | UV-Vis titration spectra of <b>CIH</b> (20 μM) in DMF:H <sub>2</sub> O (7:3, v/v, pH 7.4) HEPES buffer solution <b>(a)</b> in the presence of increasing concentration of Cu <sup>2+</sup> (0-1equiv.); <b>(b)</b> in the presence of increasing concentration of Zn <sup>2+</sup> (0-1equiv.).                                                                                                                                                                                                                                                                                                   | <b>S6</b> |
| <b>Fig. S6</b> | <b>(a)</b> Limit of detection (LOD) plot, the change in fluorescence intensity at 504 nm of <b>CIH</b> (20 μM) as a function of Zn <sup>2+</sup> ions concentration <b>(b)</b> Benesi-Hildebrand plot of <b>CIH</b> for determination of binding constant with Zn <sup>2+</sup> .                                                                                                                                                                                                                                                                                                                 | <b>S7</b> |
| <b>Fig. S7</b> | <b>(a)</b> Fluorescence titration spectra of <b>CIH</b> (20 μM, λ <sub>ex</sub> = 420 nm) in DMF:H <sub>2</sub> O (7:3, v/v, pH 7.4) HEPES buffer solution in the presence of Cu <sup>2+</sup> (0- 1 equiv.) <b>(b)</b> Limit of detection (LOD) plot, the change in fluorescence intensity at 509 nm of <b>CIH</b> (20 μM) as a function of Cu <sup>2+</sup> ions concentration <b>(c)</b> Benesi-Hildebrand plot of <b>CIH</b> for evaluation of binding constant with Cu <sup>2+</sup> and <b>(d)</b> Job's plot for determination of binding stoichiometry for <b>CIH</b> -Cu <sup>2+</sup> . | <b>S7</b> |
| <b>Fig. S8</b> | Fluorescence intensity measurement of <b>CIH</b> (20 μM) <b>(a)</b> after addition of various metal ions (20 μM) in DMF:H <sub>2</sub> O (7:3, v/v, pH 7.4) HEPES buffer solution <b>(b)</b> in the presence of Cu <sup>2+</sup> + other metal ions (20 μM) in DMF:H <sub>2</sub> O (7:3, v/v, pH 7.4) HEPES buffer solution <b>(c)</b> in the presence of Zn <sup>2+</sup> + other metal ions (20 μM) in DMF:H <sub>2</sub> O (7:3, v/v, pH 7.4) HEPES buffer solution. (λ <sub>ex</sub> = 420 nm).                                                                                              | <b>S8</b> |

|                 |                                                                                                                                                                                                                                                                                                                                                                                                                                                                                                  |                |
|-----------------|--------------------------------------------------------------------------------------------------------------------------------------------------------------------------------------------------------------------------------------------------------------------------------------------------------------------------------------------------------------------------------------------------------------------------------------------------------------------------------------------------|----------------|
| <b>Fig. S9</b>  | Fluorescence titration spectra of <b>CIH-Zn<sup>2+</sup></b> (20 $\mu$ M) with <b>Cu<sup>2+</sup></b> (0-1equiv.) in DMF:H <sub>2</sub> O (7:3, v/v, pH 7.4) HEPES buffer solution.                                                                                                                                                                                                                                                                                                              | <b>S8</b>      |
| <b>Fig. S10</b> | Images of <b>CIH</b> , <b>CIH-Zn<sup>2+</sup></b> , <b>CIH-Zn<sup>2+</sup>-Cu<sup>2+</sup></b> and <b>CIH-Zn<sup>2+</sup>-Cu<sup>2+</sup>-Zn<sup>2+</sup></b> in DMF:H <sub>2</sub> O (7:3, v/v, pH 7.4) HEPES buffer solution under (a) UV- illumination and (b) Visible light. (c) Fluorescence spectra of <b>CIH</b> upon subsequent addition of <b>Zn<sup>2+</sup></b> and <b>Cu<sup>2+</sup></b> .                                                                                          | <b>S9</b>      |
| <b>Fig. S11</b> | Time-resolved fluorescence decay profile of <b>CIH</b> in presence and absence of <b>Zn<sup>2+</sup>/Cu<sup>2+</sup></b> , respectively in DMF:H <sub>2</sub> O (7:3, v/v, pH 7.4) HEPES buffer solution.                                                                                                                                                                                                                                                                                        | <b>S9</b>      |
| <b>Fig. S12</b> | <sup>1</sup> H NMR titration of <b>CIH</b> after addition of <b>Zn<sup>2+</sup></b> (0-1 equiv.) in DMSO-d <sub>6</sub> .                                                                                                                                                                                                                                                                                                                                                                        | <b>S10</b>     |
| <b>Fig. S13</b> | IR spectrum of <b>CIH-Zn<sup>2+</sup></b> complex.                                                                                                                                                                                                                                                                                                                                                                                                                                               | <b>S10</b>     |
| <b>Fig. S14</b> | IR spectrum of <b>CIH-Cu<sup>2+</sup></b> complex.                                                                                                                                                                                                                                                                                                                                                                                                                                               | <b>S11</b>     |
| <b>Fig. S15</b> | Mass spectrum of <b>CIH-Zn<sup>2+</sup></b> complex.                                                                                                                                                                                                                                                                                                                                                                                                                                             | <b>S11</b>     |
| <b>Fig. S16</b> | Mass spectrum of <b>CIH-Cu<sup>2+</sup></b> complex.                                                                                                                                                                                                                                                                                                                                                                                                                                             | <b>S12</b>     |
| <b>Fig. S17</b> | (a) A one-dimensional supramolecular structure of <b>CIH-Zn<sup>2+</sup></b> complex in a coordination polymer frame work (b) three-dimensional structure of <b>CIH-Zn<sup>2+</sup></b> complex.                                                                                                                                                                                                                                                                                                 | <b>S12</b>     |
| <b>Fig. S18</b> | (a) Changes in emission intensity of <b>CIH</b> ( $\lambda_{ex}$ = 420 nm) in the presence and absence of <b>Zn<sup>2+</sup></b> and EDTA. Inset: Diagram depicting the emission output at 504 nm. (b) Schematic illustration of INHIBIT and the IMPLICATION logic gate. (c) Changes in the emission intensity of <b>CIH</b> ( $\lambda_{ex}$ = 420 nm) in the presence and absence of <b>Cu<sup>2+</sup></b> and EDTA. Inset: Diagram depicting the emission output at 509 nm. (d) truth table. | <b>S13</b>     |
| <b>Fig. S19</b> | MTT assay plot showing treatment of SiHa cells with various concentration of <b>CIH</b> (1, 5, 10, 20 and 50 $\mu$ M) for 4 h.                                                                                                                                                                                                                                                                                                                                                                   | <b>S13</b>     |
| <b>Table S1</b> | Quantum yields and Fluorescence decay parameters of <b>CIH</b> before and after treatment with <b>Zn<sup>2+</sup>/Cu<sup>2+</sup></b> in DMF:H <sub>2</sub> O (7:3, v/v, pH 7.4) HEPES buffer solution.                                                                                                                                                                                                                                                                                          | <b>S14</b>     |
| <b>Table S2</b> | Important crystallographic data of <b>CIH-Zn<sup>2+</sup></b> complex                                                                                                                                                                                                                                                                                                                                                                                                                            | <b>S14-S15</b> |
| <b>Table S3</b> | List of bond lengths for <b>CIH-Zn<sup>2+</sup></b>                                                                                                                                                                                                                                                                                                                                                                                                                                              | <b>S15-S16</b> |
| <b>Table S4</b> | List of bond angles for <b>CIH-Zn<sup>2+</sup></b>                                                                                                                                                                                                                                                                                                                                                                                                                                               | <b>S16-S18</b> |
| <b>Table S5</b> | Comparison of <b>CIH</b> with the previously reported sensors.                                                                                                                                                                                                                                                                                                                                                                                                                                   | <b>S18</b>     |
|                 | References                                                                                                                                                                                                                                                                                                                                                                                                                                                                                       | <b>S19</b>     |

## Methods and measurements

### Limit of detection (LOD)

The limit of detection for **CIH** was determined using fluorescence titration data and the IUPAC definition based on a plot of emission intensity vs. increasing  $Zn^{2+}/Cu^{2+}$  concentration. We repeated our observations eight times, measuring the emission intensity of **CIH** without  $Zn^{2+}/Cu^{2+}$  at every repetition and calculated the standard deviation of blank data. Fluorescence intensity data at 509 nm against  $Zn^{2+}/Cu^{2+}$  concentration were plotted to determine the slope. The detection limit is established using the following equation:<sup>1</sup>

$$\text{Limit of detection (LOD)} = \frac{3SD}{\text{Slope}(m)}$$

Where, the variables  $m$ , stands for the slope of intensity vs. sample concentration, and  $SD$ , stands for the standard deviation of blank readings.

### Binding constant ( $K_a$ )

Using the Job's plot, the binding ratio of **CIH** to metal ions was calculated. The Benesi-Hildebrand equation was used to determine the binding constants ( $K_a$ ) of **CIH** for  $Zn^{2+}$  and  $Cu^{2+}$ .<sup>2</sup>

$$\frac{I_o}{I - I_o} = \frac{a}{b - a} \left( \frac{1}{K_a [\text{Metal}]} + 1 \right)$$

Where,  $I$  and  $I_0$  represent the intensity of **CIH** fluorescence at 509 nm in the presence and absence of  $Zn^{2+}/Cu^{2+}$ , respectively;  $a$  and  $b$  are constants; and  $[\text{Metal}]$  represents the concentration of  $Zn^{2+}/Cu^{2+}$ .

### Fluorescence quantum yield measurements

The following equation was used to calculate quantum yield:<sup>3</sup>

$$Q = Q_r \left( \frac{I}{I_r} \right) \left( \frac{OD}{OD_r} \right) \left( \frac{n^2}{n_r^2} \right)$$

Where  $Q$  is the fluorescence quantum yield,  $I$  is the integrated fluorescence intensity,  $n$  is the refractive index of liquid, and  $OD$  is the optical density (absorption). The subscript  $r$  is used to represent the known quantum yield of reference quinine sulfate, which is 0.54 in 0.1 M  $H_2SO_4$ .

### Fluorescence decay measurements

To explore sensing properties, time-resolved fluorescence spectra were taken. The following equation has been used to calculate dynamic parameters:

$$y = A_1 * \exp\left(-\frac{x}{\tau_1}\right) + A_2 * \exp\left(-\frac{x}{\tau_2}\right) + y_0$$

The following equation was used for calculating the weighted mean lifetime:

$$\langle \tau \rangle = (A_1\tau_1 + A_2\tau_2)/(A_1 + A_2)$$

Where,  $\tau_1/\tau_2$  and  $A_1/A_2$  are lifetimes ( $\tau$ ) and the fractions or amplitudes (A), respectively.

The following equations are used to compute the radiative rate constant ( $K_r$ ) and non-radiative rate constant ( $K_{nr}$ ):<sup>4</sup>

$$\langle \tau \rangle^{-1} = (K_r + K_{nr})$$

$$K_r = \frac{\Phi}{\langle \tau \rangle}$$

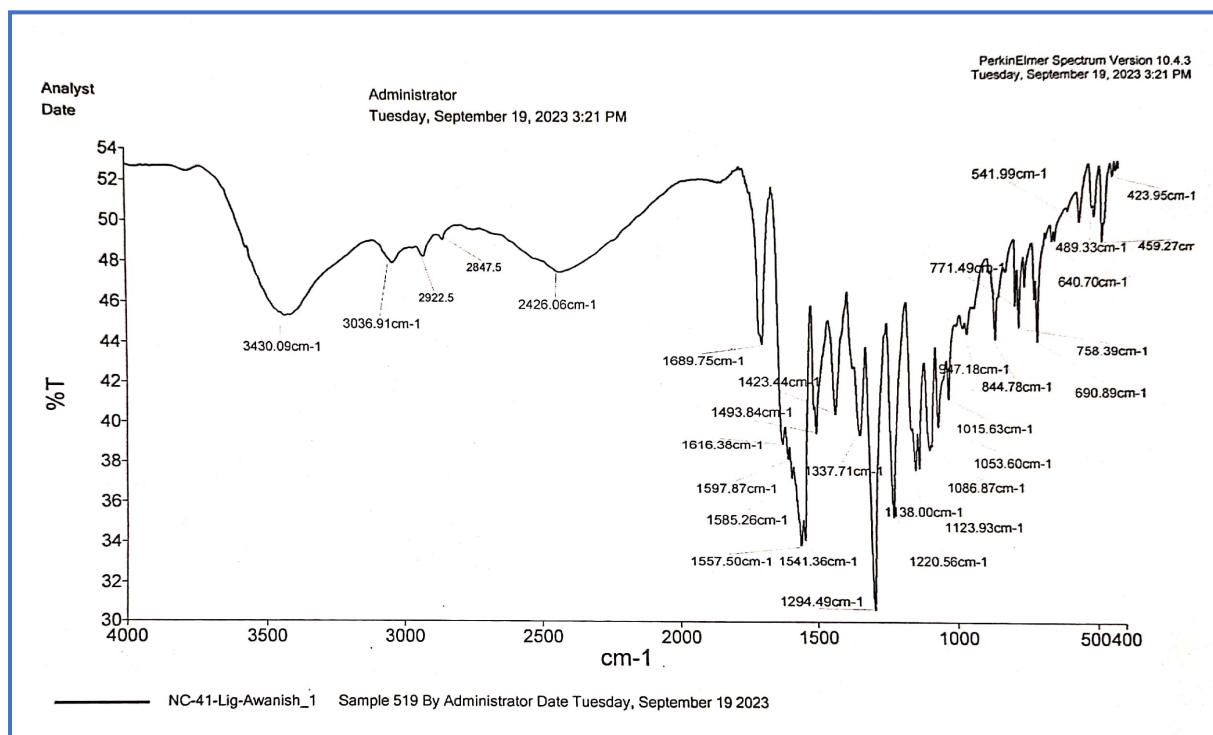

**Fig. S1** IR spectrum of CIH.

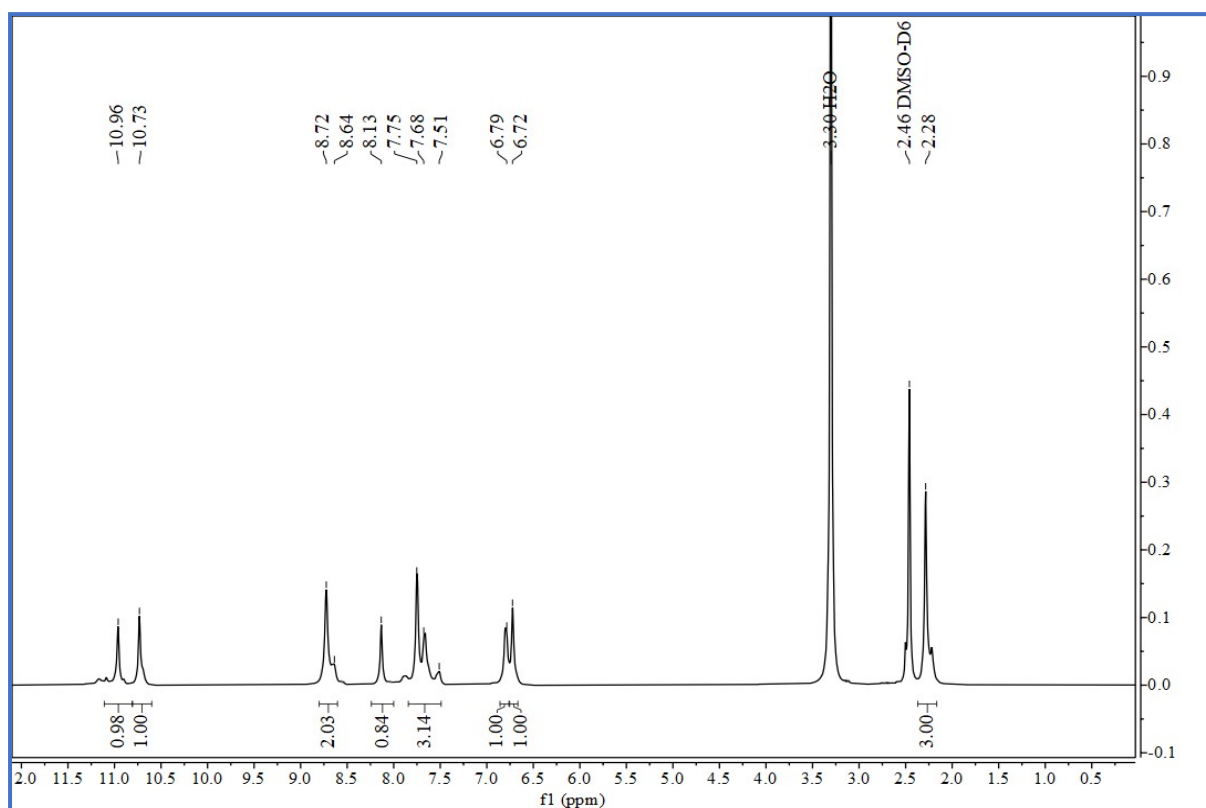

**Fig. S2** <sup>1</sup>H NMR spectrum of CIH

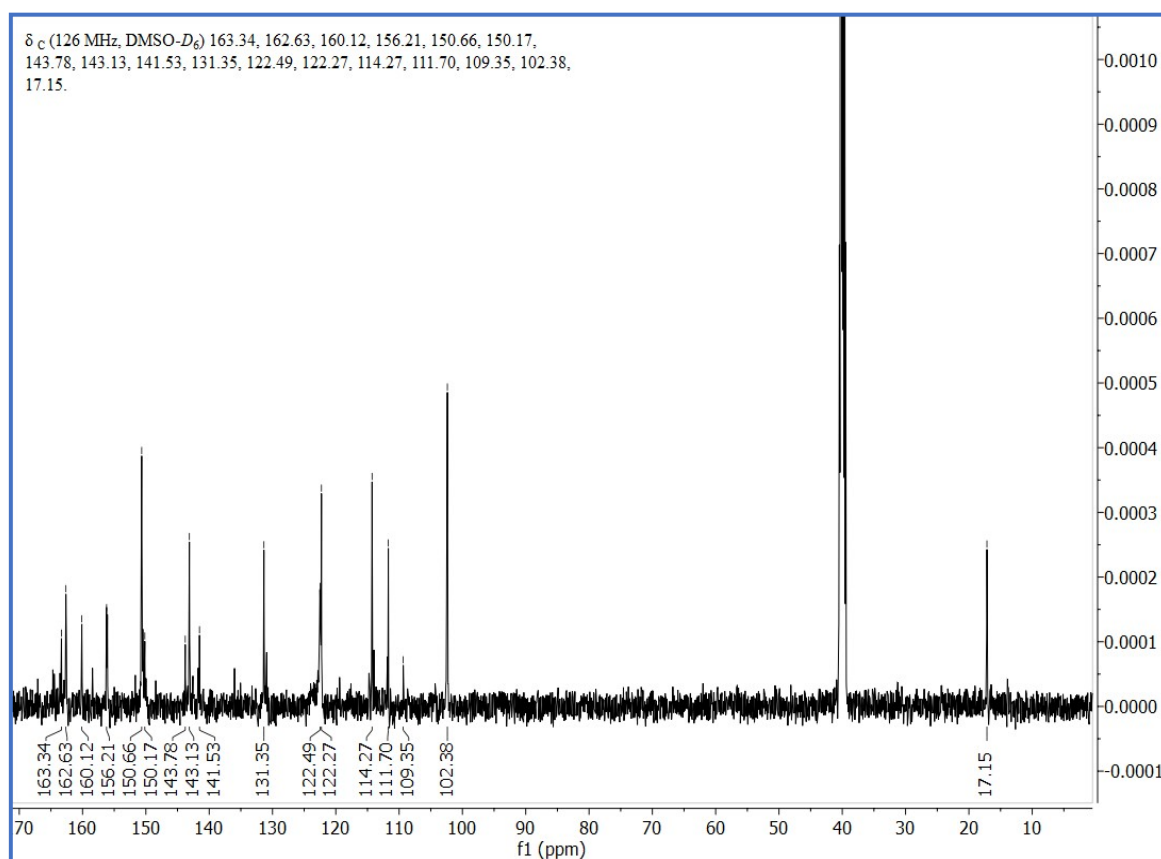

**Fig. S3**  $^{13}\text{C}$  NMR spectrum of CIH

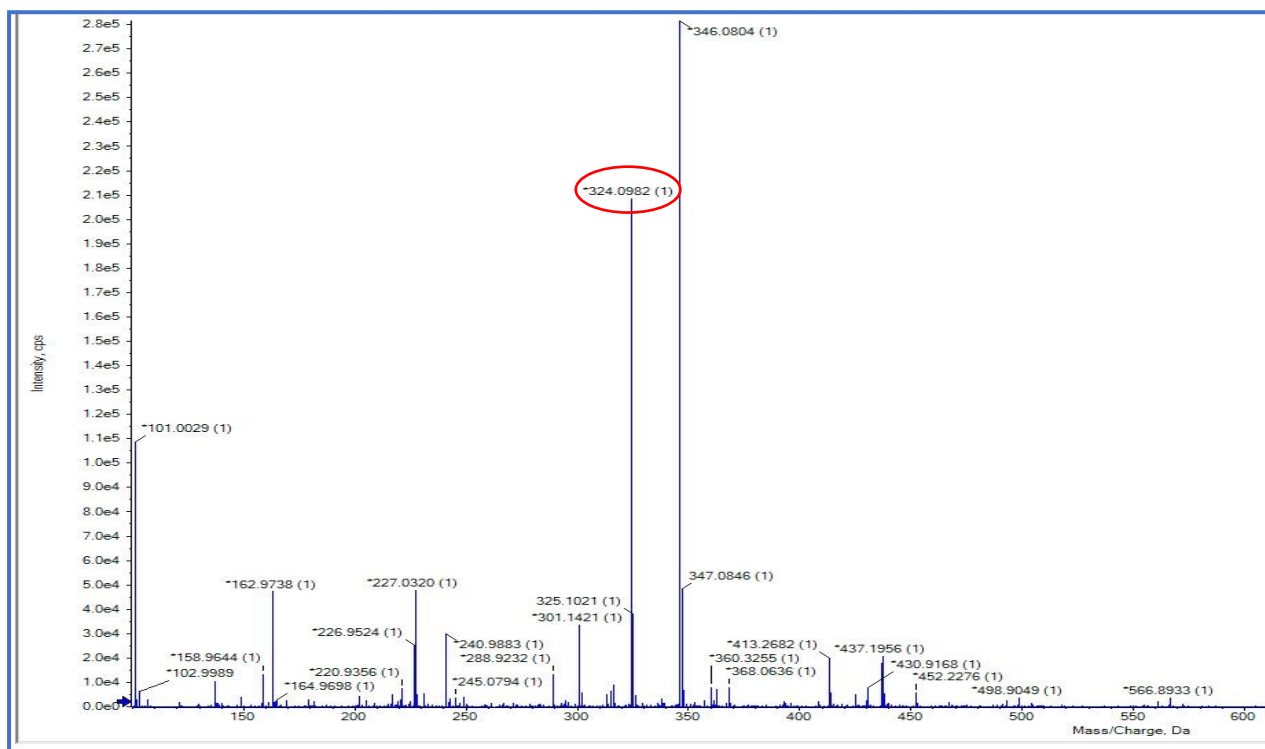

**Fig. S4** Mass spectrum of CIH

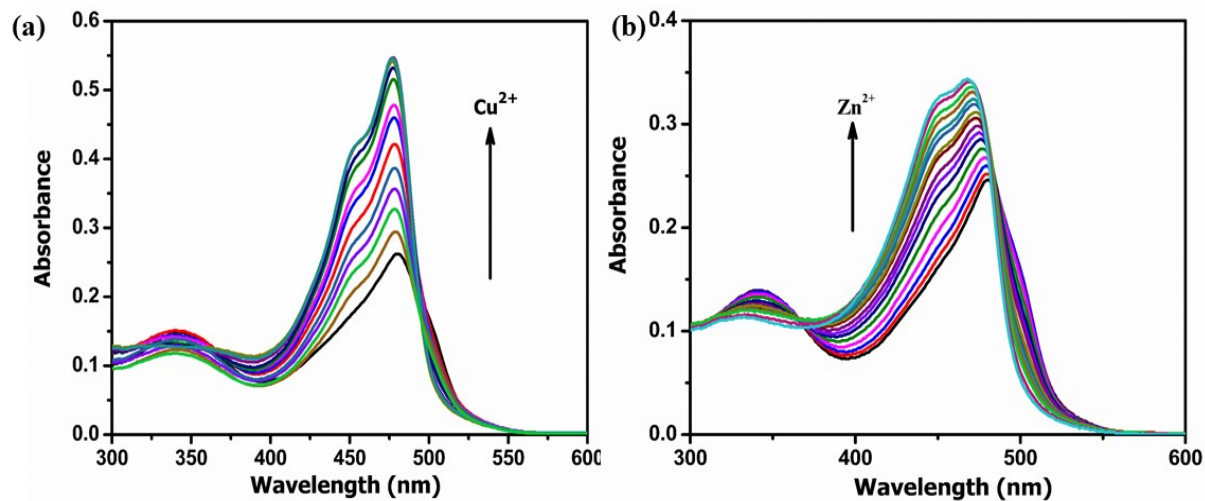

**Fig. S5** UV-Vis titration spectra of CIH (20  $\mu\text{M}$ ) in DMF:H<sub>2</sub>O (7:3, v/v, pH 7.4) HEPES buffer solution (a) in the presence of increasing concentration of  $\text{Cu}^{2+}$  (0-1equiv.); (b) in the presence of increasing concentration of  $\text{Zn}^{2+}$  (0-1equiv.).

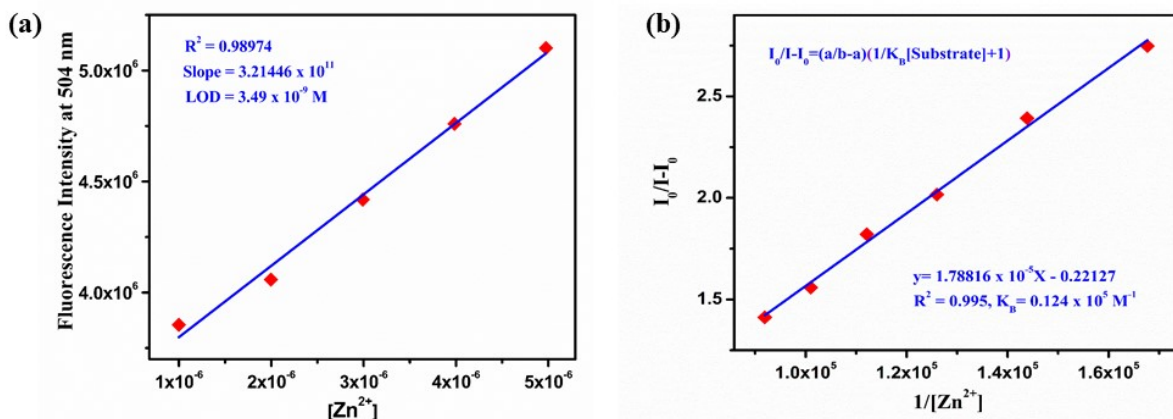

**Fig. S6** (a) Limit of detection (LOD) plot, the change in fluorescence intensity at 504 nm of **CIH** (20  $\mu$ M) as a function of  $Zn^{2+}$  ions concentration (b) Benesi-Hildebrand plot of **CIH** for determination of binding constant with  $Zn^{2+}$ .

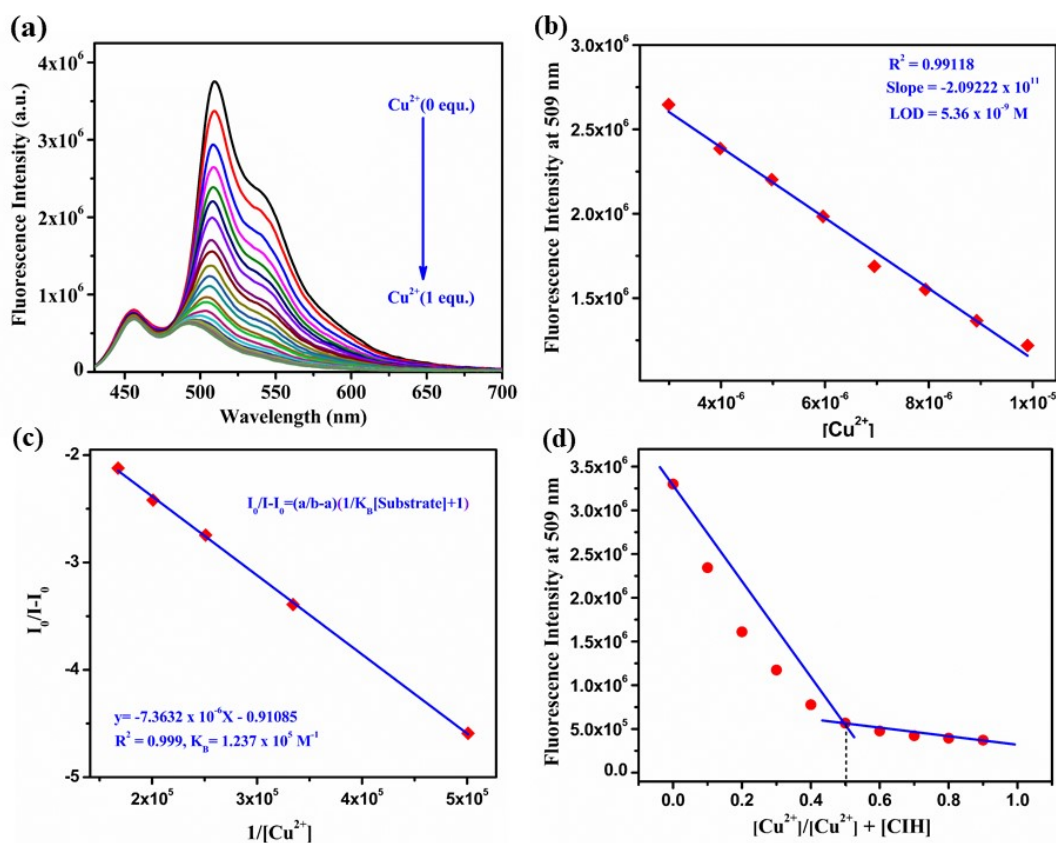

**Fig. S7** (a) Fluorescence titration spectra of **CIH** (20  $\mu$ M,  $\lambda_{ex} = 420$  nm) in DMF:H<sub>2</sub>O (7:3, v/v, pH 7.4) HEPES buffer solution in the presence of  $Cu^{2+}$  (0- 1 equiv.) (b) Limit of detection (LOD) plot, the change in fluorescence intensity at 509 nm of **CIH** (20  $\mu$ M) as a function of  $Cu^{2+}$  ion concentration (c) Benesi-Hildebrand plot of **CIH** for evaluation of binding constant with  $Cu^{2+}$  and (d) Job's plot for determination of binding stoichiometry for **CIH**- $Cu^{2+}$ .

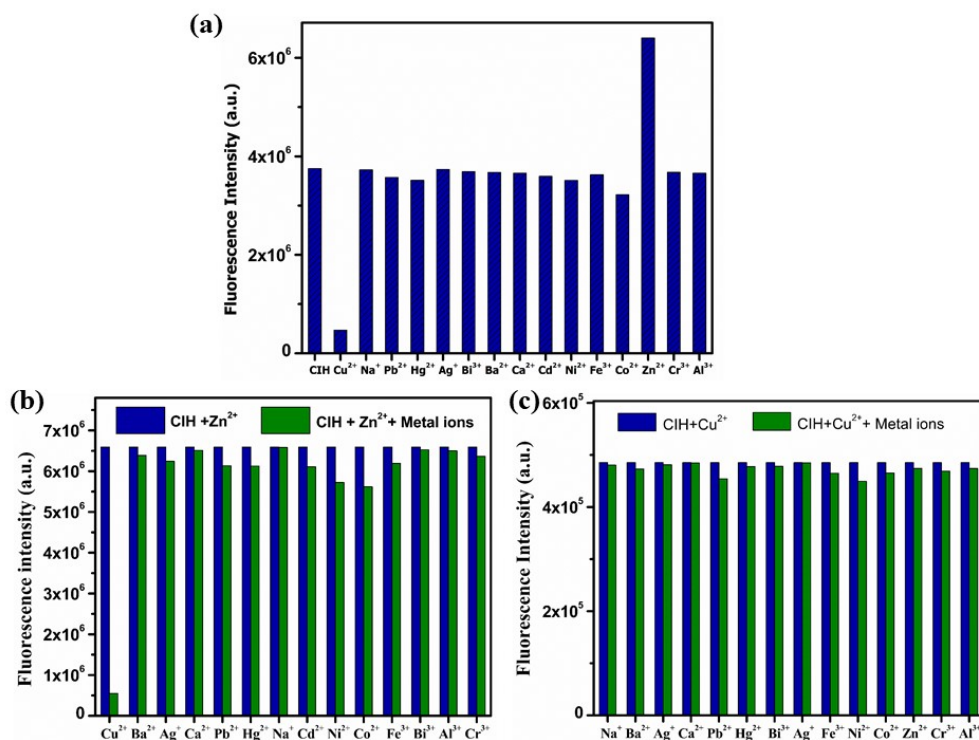

**Fig. S8** Fluorescence intensity measurement of **CIH** (20  $\mu\text{M}$ ) **(a)** after addition of various metal ions (20  $\mu\text{M}$ ) in DMF:H<sub>2</sub>O (7:3, v/v, pH 7.4) HEPES buffer solution **(b)** in the presence of  $\text{Cu}^{2+}$  + other metal ions (20  $\mu\text{M}$ ) in DMF:H<sub>2</sub>O (7:3, v/v, pH 7.4) HEPES buffer solution **(c)** in the presence of  $\text{Zn}^{2+}$  + other metal ions (20  $\mu\text{M}$ ) in DMF:H<sub>2</sub>O (7:3, v/v, pH 7.4) HEPES buffer solution. ( $\lambda_{\text{ex}} = 420 \text{ nm}$ ).

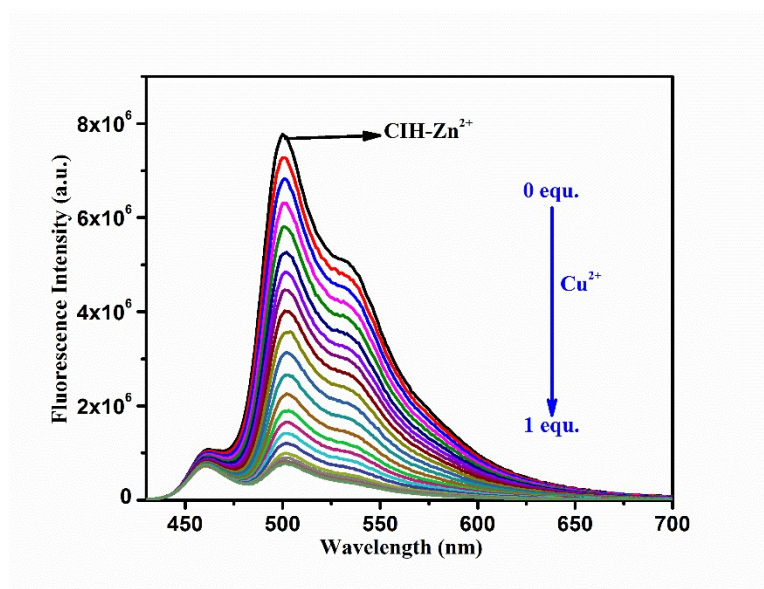

**Fig. S9** Fluorescence titration spectra of **CIH-Zn<sup>2+</sup>** (20  $\mu\text{M}$ ) with  $\text{Cu}^{2+}$  (0-1equiv.) in DMF:H<sub>2</sub>O (7:3, v/v, pH 7.4) HEPES buffer solution.



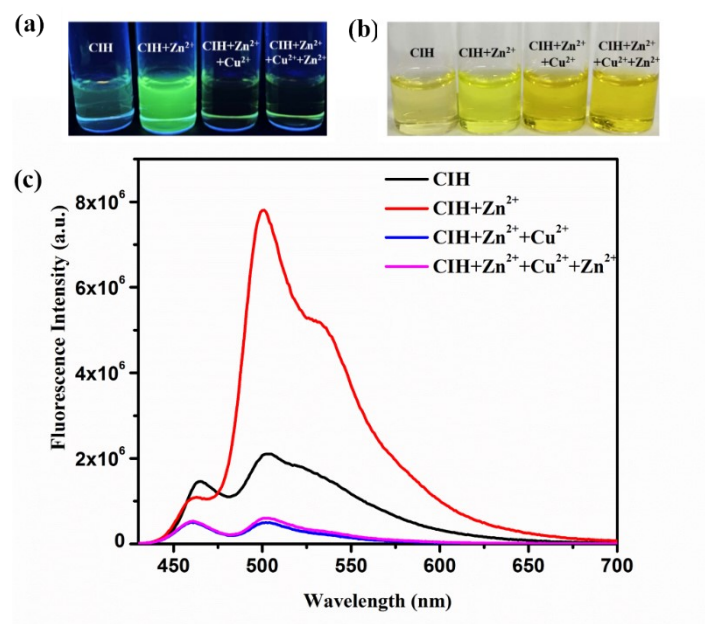

**Fig. S10** Images of **CIH**, **CIH-Zn<sup>2+</sup>**, **CIH-Zn<sup>2+</sup>-Cu<sup>2+</sup>** and **CIH-Zn<sup>2+</sup>-Cu<sup>2+</sup>-Zn<sup>2+</sup>** in DMF:H<sub>2</sub>O (7:3, v/v, pH 7.4) HEPES buffer solution under (a) UV- illumination and (b) Visible light. (c) Fluorescence spectra of **CIH** upon subsequent addition of Zn<sup>2+</sup> and Cu<sup>2+</sup>.

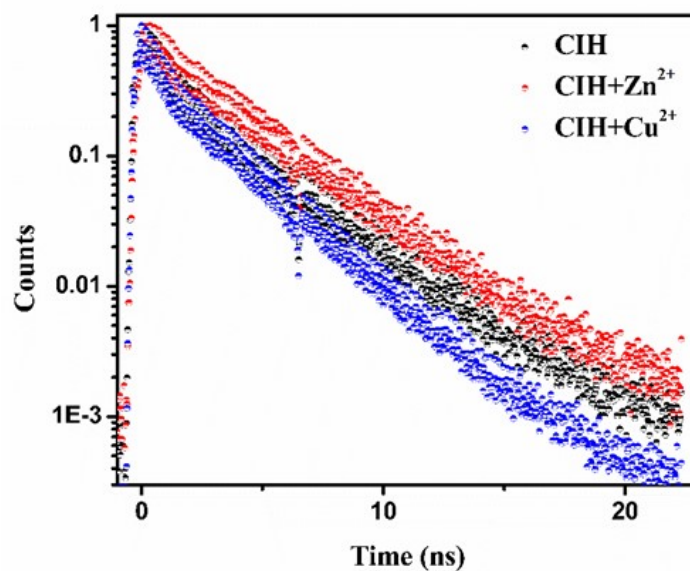

**Fig. S11** Time-resolved fluorescence decay profile of **CIH** in presence and absence of Zn<sup>2+</sup>/Cu<sup>2+</sup>, respectively in DMF:H<sub>2</sub>O (7:3, v/v, pH 7.4) HEPES buffer solution.

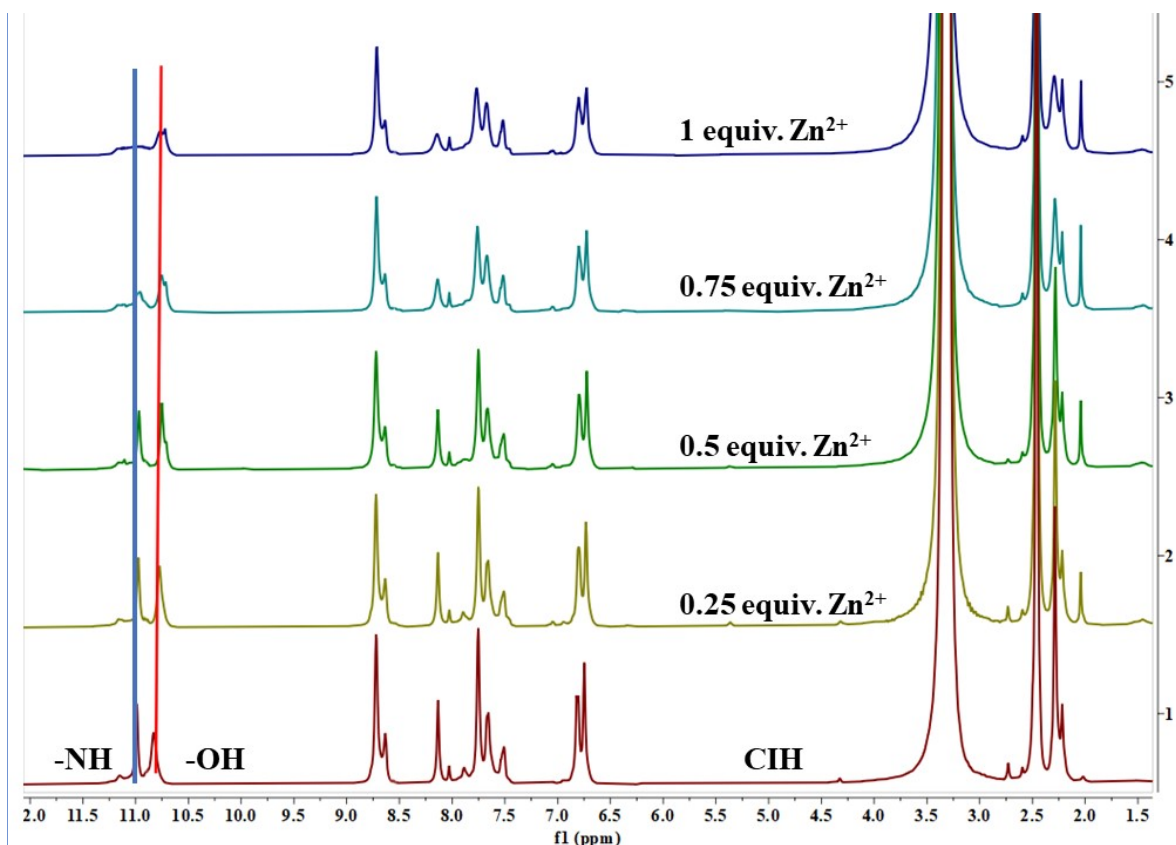

**Fig. S12**  $^1\text{H}$  NMR titration of CIH after addition of  $\text{Zn}^{2+}$  (0-1 equiv.) in  $\text{DMSO-d}_6$ .

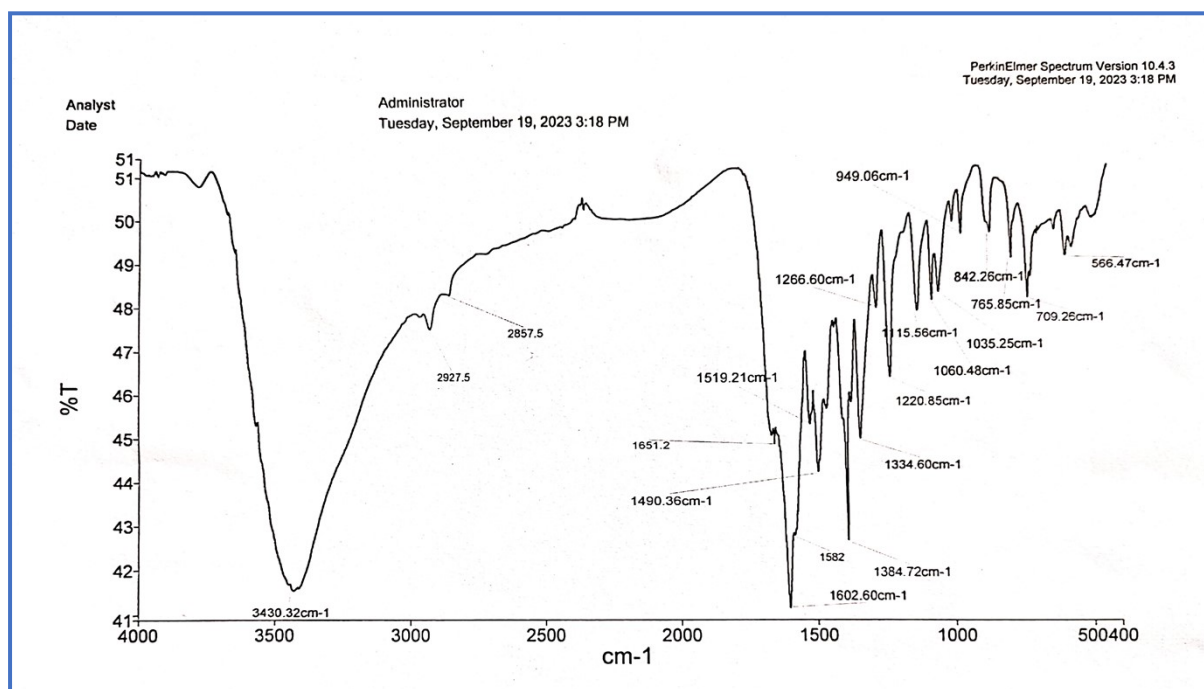

**Fig. S13** IR spectrum of CIH- $\text{Zn}^{2+}$  complex.

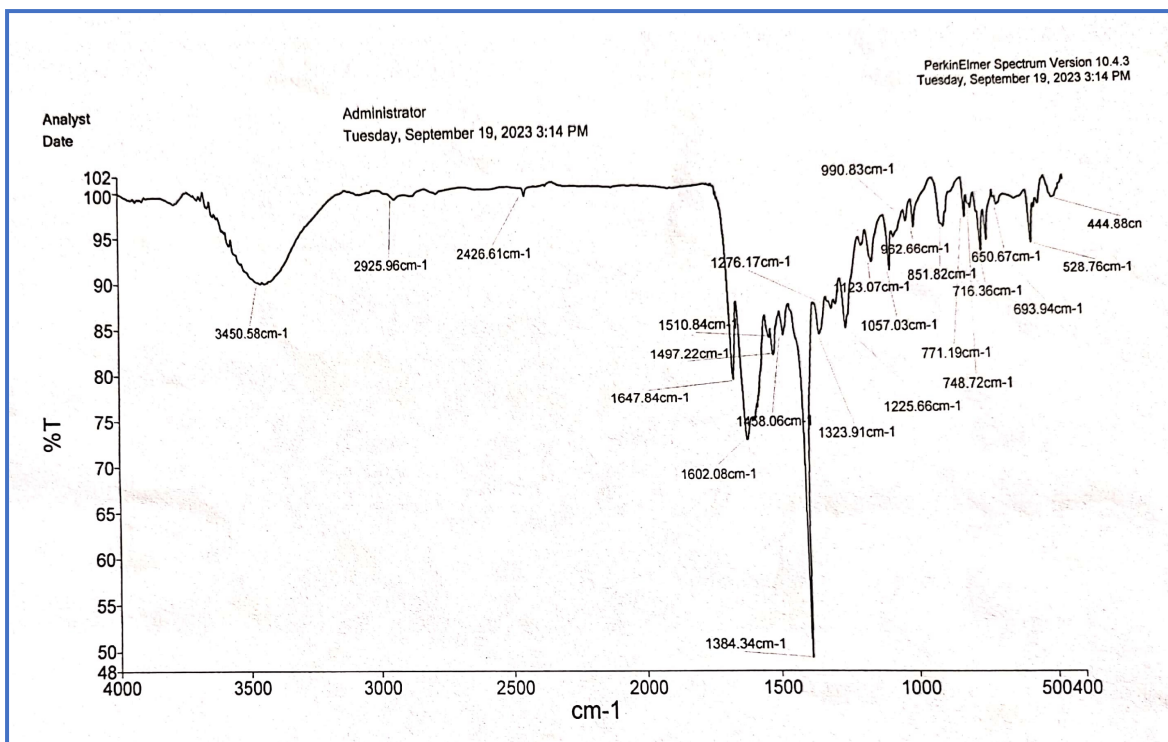

Fig. S14 IR spectrum of CIH-Cu<sup>2+</sup> complex.

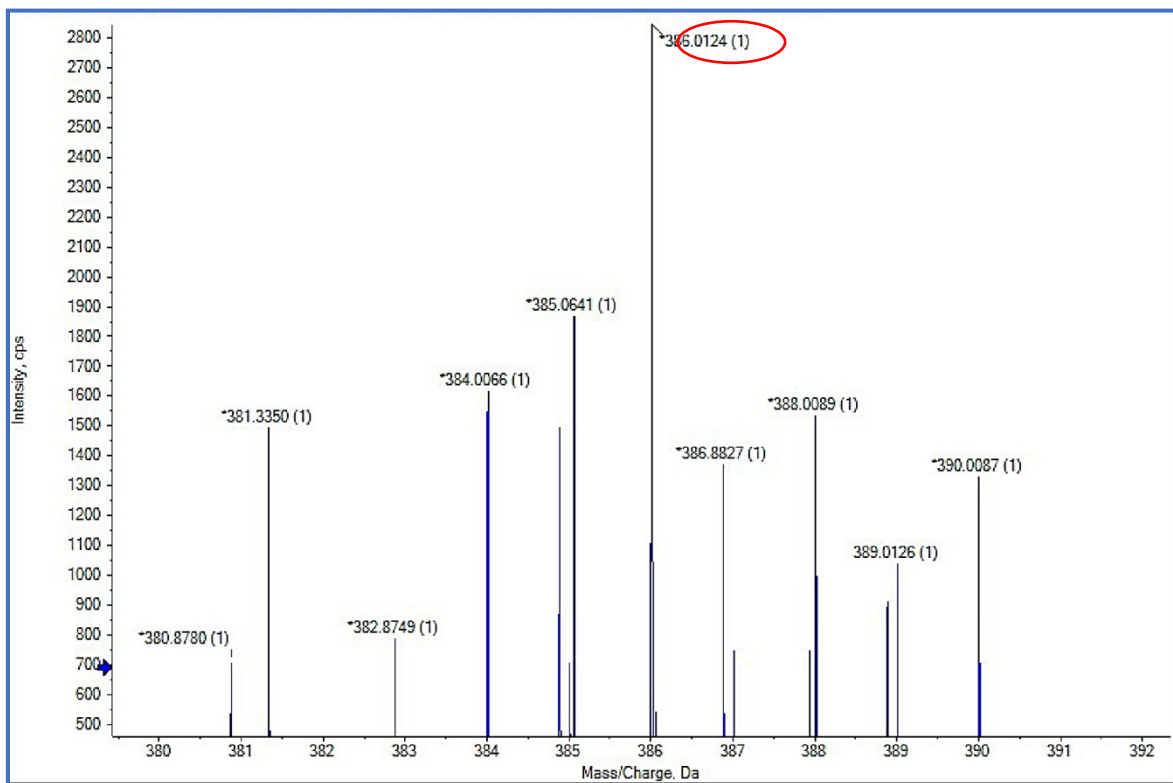

Fig. S15 Mass spectrum of CIH-Zn<sup>2+</sup>

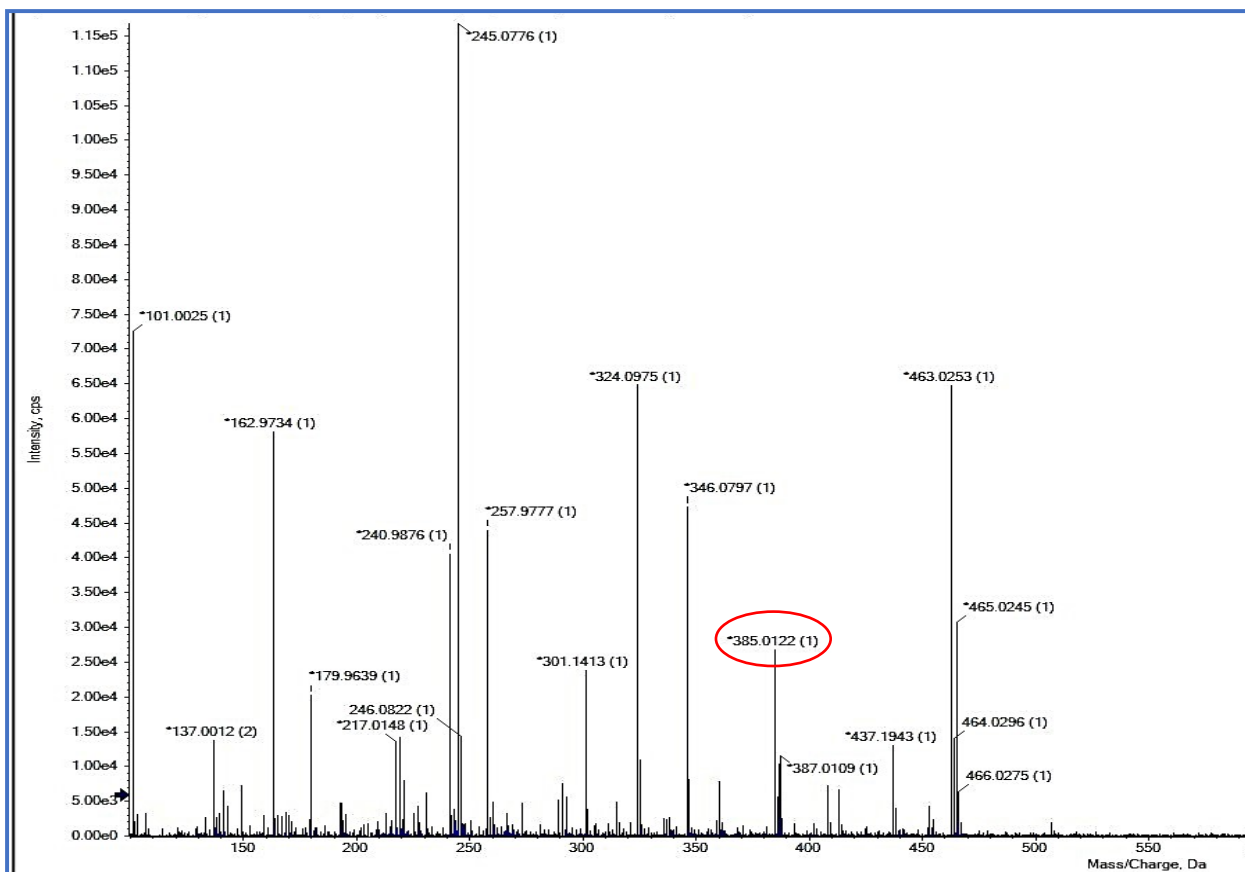

**Fig. S16** Mass spectrum of CIH-Cu<sup>2+</sup>

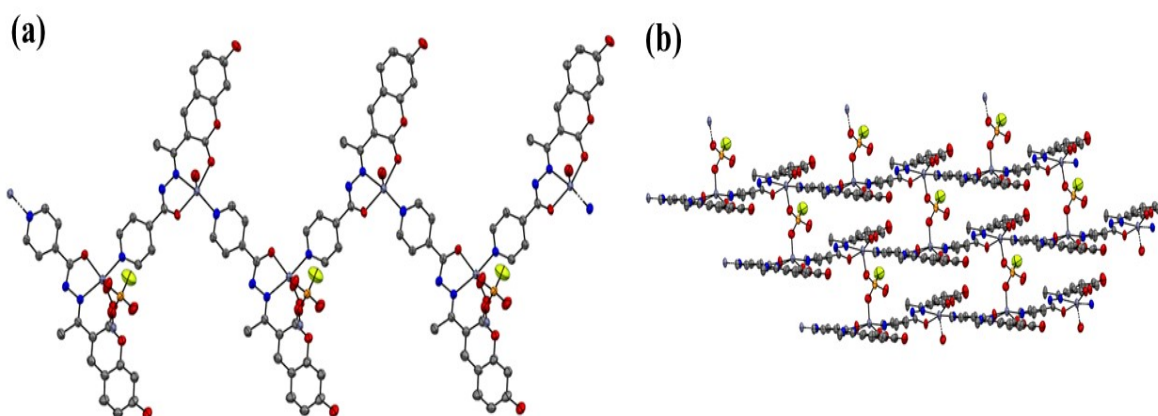

**Fig. S17** (a) A one-dimensional supramolecular structure of CIH-Zn<sup>2+</sup> complex in a coordination polymer framework (b) three-dimensional structure of CIH-Zn<sup>2+</sup> complex.

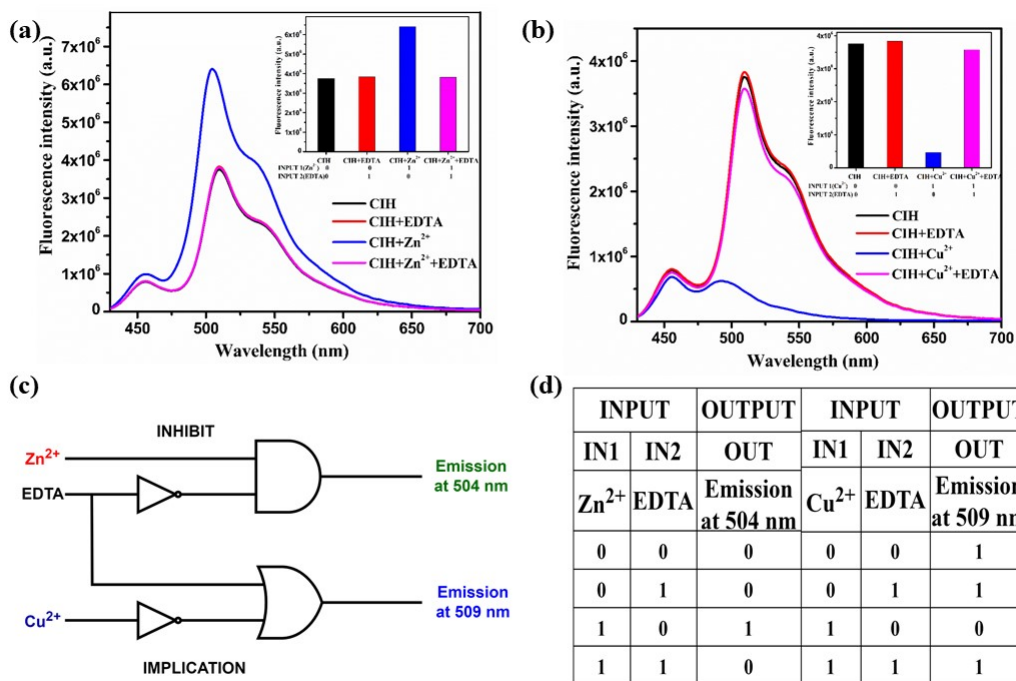

**Fig. S18** (a) Changes in emission intensity of CIH ( $\lambda_{ex} = 420$  nm) in the presence and absence of Zn<sup>2+</sup> and EDTA. Inset: Diagram depicting the emission output at 504 nm. (b) Changes in the emission intensity of CIH ( $\lambda_{ex} = 420$  nm) in the presence and absence of Cu<sup>2+</sup> and EDTA. Inset: Diagram depicting the emission output at 509 nm. (c) Schematic illustration of INHIBIT and the IMPLICATION logic gate. (d) truth table.

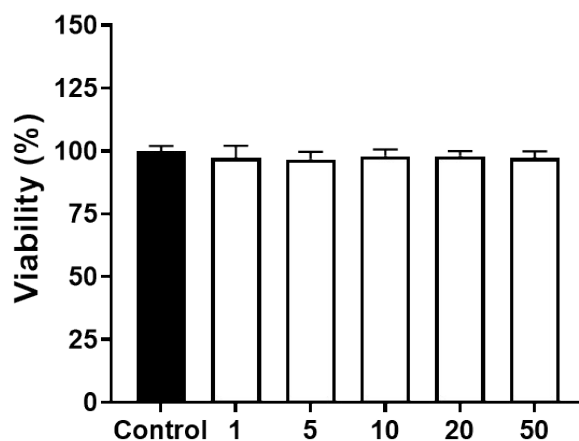

**Fig. S19** MTT assay plot showing treatment of SiHa cells with various concentration of CIH (1, 5, 10, 20 and 50  $\mu$ M) for 4 h.

**Table S1** Quantum yields and fluorescence decay parameters of **CIH** before and after treatment with  $Zn^{2+}/Cu^{2+}$  in DMF:H<sub>2</sub>O (7:3, v/v, pH 7.4) HEPES buffer solution.

| Sample                     | A          | $\tau$ (ns)        | $\langle \tau \rangle$ (ns) | $\Phi$                 | Kr(s)              | Knr(s)             |
|----------------------------|------------|--------------------|-----------------------------|------------------------|--------------------|--------------------|
| <b>CIH</b>                 | 0.521 (A1) | 1.075( $\tau$ 1)   | 2.055                       | $10.41 \times 10^{-3}$ | $5.07 \times 10^6$ | $4.81 \times 10^8$ |
|                            | 0.348 (A2) | 3.526 ( $\tau$ 2)  |                             |                        |                    |                    |
| <b>CIH-Zn<sup>2+</sup></b> | 0.146 (A1) | 0.99395( $\tau$ 1) | 2.966                       | $24.72 \times 10^{-3}$ | $8.33 \times 10^6$ | $3.29 \times 10^8$ |
|                            | 0.637 (A2) | 3.41947( $\tau$ 2) |                             |                        |                    |                    |
| <b>CIH-Cu<sup>2+</sup></b> | 0.482 (A1) | 0.691 ( $\tau$ 1)  | 1.658                       | $2.70 \times 10^{-3}$  | $1.63 \times 10^6$ | $6.01 \times 10^8$ |
|                            | 0.403 (A2) | 2.815 ( $\tau$ 2)  |                             |                        |                    |                    |

**Table S2**  
Important crystallographic data of **CIH-Zn<sup>2+</sup>** complex

|                              |                                                                                  |
|------------------------------|----------------------------------------------------------------------------------|
| CCDC No.                     | <u>2305336</u>                                                                   |
| Empirical formula            | C <sub>34</sub> H <sub>24</sub> FN <sub>6</sub> O <sub>11</sub> PZn <sub>2</sub> |
| Formula weight               | 873.30                                                                           |
| Temperature (K)              | 293                                                                              |
| Crystal system               | triclinic                                                                        |
| Space group                  | P-1                                                                              |
| a (Å)                        | 11.6235(3)                                                                       |
| b (Å)                        | 12.0608(5)                                                                       |
| c (Å)                        | 16.9201(7)                                                                       |
| $\alpha$ (°)                 | 77.785(4)                                                                        |
| $\beta$ (°)                  | 87.986(3)                                                                        |
| $\gamma$ (°)                 | 77.824(3)                                                                        |
| Volume (Å <sup>3</sup> )     | 2266.04(15)                                                                      |
| Z                            | 2                                                                                |
| Density (g/cm <sup>3</sup> ) | 1.280                                                                            |
| $\mu$ (mm <sup>-1</sup> )    | 2.155                                                                            |

|                                   |                                                               |
|-----------------------------------|---------------------------------------------------------------|
| F(000)                            | 884.0                                                         |
| Crystal size (mm <sup>3</sup> )   | 0.025 × 0.02 × 0.01                                           |
| Radiation                         | Cu Kα (λ = 1.54184)                                           |
| 2Θ range for data collection (°)  | 5.344 to 144.238                                              |
| Reflections collected             | 29742                                                         |
| Independent reflections           | 8843 [R <sub>int</sub> = 0.0494, R <sub>sigma</sub> = 0.0489] |
| Data/restraints/parameters        | 8843/0/502                                                    |
| Goodness-of-fit on F <sup>2</sup> | 1.054                                                         |
| Final R indexes [I ≥ 2σ (I)]      | R <sub>1</sub> = 0.0665, wR <sub>2</sub> = 0.1947             |
| Final R indexes [all data]        | R <sub>1</sub> = 0.0821, wR <sub>2</sub> = 0.2047             |

$${}^a R_1 = \frac{\sum ||F_o| - |F_c||}{\sum |F_o|}$$

$${}^b R_2 = \left[ \frac{\sum w(|F^2_o| - |F^2_c|)^2}{\sum w|F^2_o|} \right]^{1/2}$$

**Table S3** List of bond lengths for **CIH-Zn<sup>2+</sup>**

| Atom | Atom             | Length/Å | Atom | Atom | Length/Å |
|------|------------------|----------|------|------|----------|
| Zn1  | O4               | 1.989(3) | O8   | C32  | 1.323(6) |
| Zn1  | O3               | 2.055(3) | C13  | C12  | 1.493(6) |
| Zn1  | N4               | 2.053(4) | C13  | C14  | 1.395(6) |
| Zn1  | O9               | 1.965(4) | C13  | C15  | 1.386(7) |
| Zn1  | N1               | 2.092(4) | C26  | C27  | 1.454(6) |
| Zn2  | O6               | 2.144(3) | C26  | C28  | 1.373(6) |
| Zn2  | O5               | 2.068(3) | C26  | C24  | 1.454(6) |
| Zn2  | O10 <sup>1</sup> | 2.075(4) | C23  | C22  | 1.501(6) |
| Zn2  | N3 <sup>2</sup>  | 2.071(4) | C28  | C29  | 1.413(7) |
| Zn2  | N6               | 2.088(4) | C24  | C25  | 1.507(6) |
| P1   | O10              | 1.450(4) | C17  | C15  | 1.387(6) |
| P1   | O9               | 1.448(4) | C22  | C21  | 1.391(6) |
| P1   | O11              | 1.454(4) | C22  | C20  | 1.394(7) |
| P1   | F1               | 1.473(5) | C29  | C34  | 1.385(7) |
| O7   | C27              | 1.355(5) | C29  | C30  | 1.408(7) |
| O7   | C34              | 1.377(6) | C34  | C33  | 1.389(7) |
| O6   | C27              | 1.235(5) | C5   | C3   | 1.379(7) |

| Atom | Atom | Length/Å | Atom | Atom | Length/Å |
|------|------|----------|------|------|----------|
| O5   | C23  | 1.265(5) | C5   | C6   | 1.386(7) |
| O2   | C5   | 1.379(6) | C21  | C19  | 1.383(6) |
| O2   | C9   | 1.357(6) | C8   | C10  | 1.486(7) |
| O4   | C12  | 1.274(5) | C8   | C9   | 1.449(7) |
| O3   | C9   | 1.216(6) | C8   | C7   | 1.363(7) |
| N5   | N6   | 1.391(5) | C10  | C11  | 1.499(7) |
| N5   | C23  | 1.306(6) | C14  | C16  | 1.380(7) |
| O1   | C1   | 1.343(6) | C1   | C3   | 1.385(7) |
| N3   | C17  | 1.327(6) | C1   | C2   | 1.405(8) |
| N3   | C16  | 1.349(6) | C30  | C31  | 1.354(7) |
| N6   | C24  | 1.299(6) | C7   | C6   | 1.415(7) |
| N2   | N1   | 1.395(5) | C31  | C32  | 1.394(8) |
| N2   | C12  | 1.312(6) | C6   | C4   | 1.405(7) |
| N4   | C19  | 1.333(6) | C20  | C18  | 1.352(7) |
| N4   | C18  | 1.349(6) | C32  | C33  | 1.410(7) |
| N1   | C10  | 1.301(6) | C2   | C4   | 1.359(8) |

**Table S4** List of bond angles for **CIH-Zn<sup>2+</sup>**

| Atom | Atom | Atom             | Angle/°    | Atom | Atom | Atom | Angle/°  |
|------|------|------------------|------------|------|------|------|----------|
| O4   | Zn1  | O3               | 148.18(17) | C28  | C26  | C24  | 119.8(4) |
| O4   | Zn1  | N4               | 96.27(15)  | O5   | C23  | N5   | 128.0(4) |
| O4   | Zn1  | N1               | 78.41(14)  | O5   | C23  | C22  | 117.7(4) |
| O3   | Zn1  | N1               | 83.86(15)  | N5   | C23  | C22  | 114.3(4) |
| N4   | Zn1  | O3               | 90.24(15)  | O7   | C27  | C26  | 119.1(4) |
| N4   | Zn1  | N1               | 157.78(18) | O6   | C27  | O7   | 113.3(4) |
| O9   | Zn1  | O4               | 99.50(17)  | O6   | C27  | C26  | 127.6(4) |
| O9   | Zn1  | O3               | 109.76(18) | C26  | C28  | C29  | 123.9(4) |
| O9   | Zn1  | N4               | 101.15(19) | N6   | C24  | C26  | 120.3(4) |
| O9   | Zn1  | N1               | 101.01(19) | N6   | C24  | C25  | 121.9(4) |
| O5   | Zn2  | O6               | 161.42(12) | C26  | C24  | C25  | 117.9(4) |
| O5   | Zn2  | O10 <sup>1</sup> | 94.16(16)  | N3   | C17  | C15  | 122.2(4) |
| O5   | Zn2  | N3 <sup>2</sup>  | 95.87(14)  | C21  | C22  | C23  | 120.9(4) |
| O5   | Zn2  | N6               | 77.52(13)  | C21  | C22  | C20  | 117.6(4) |



| Atom             | Atom | Atom             | Angle/°    | Atom | Atom | Atom | Angle/°  |
|------------------|------|------------------|------------|------|------|------|----------|
| O10 <sup>1</sup> | Zn2  | O6               | 91.56(15)  | C20  | C22  | C23  | 121.5(4) |
| O10 <sup>1</sup> | Zn2  | N6               | 98.27(15)  | C34  | C29  | C28  | 116.9(4) |
| N3 <sup>2</sup>  | Zn2  | O6               | 101.45(14) | C34  | C29  | C30  | 118.1(4) |
| N3 <sup>2</sup>  | Zn2  | O10 <sup>1</sup> | 93.24(17)  | C30  | C29  | C28  | 124.8(4) |
| N3 <sup>2</sup>  | Zn2  | N6               | 167.08(16) | O7   | C34  | C29  | 120.7(4) |
| N6               | Zn2  | O6               | 84.17(13)  | O7   | C34  | C33  | 117.1(4) |
| O10              | P1   | O11              | 112.1(2)   | C29  | C34  | C33  | 122.2(5) |
| O10              | P1   | F1               | 109.4(3)   | O2   | C5   | C3   | 116.9(5) |
| O9               | P1   | O10              | 107.5(3)   | O2   | C5   | C6   | 119.0(4) |
| O9               | P1   | O11              | 110.0(3)   | C3   | C5   | C6   | 124.1(5) |
| O9               | P1   | F1               | 107.9(3)   | C19  | C21  | C22  | 119.2(4) |
| O11              | P1   | F1               | 109.9(3)   | C9   | C8   | C10  | 121.3(4) |
| C27              | O7   | C34              | 122.7(4)   | C7   | C8   | C10  | 121.1(5) |
| C27              | O6   | Zn2              | 124.5(3)   | C7   | C8   | C9   | 117.7(5) |
| C23              | O5   | Zn2              | 109.1(3)   | N1   | C10  | C8   | 119.7(4) |
| C9               | O2   | C5               | 123.4(4)   | N1   | C10  | C11  | 122.3(4) |
| C12              | O4   | Zn1              | 111.0(3)   | C8   | C10  | C11  | 117.9(4) |
| C9               | O3   | Zn1              | 126.8(3)   | O2   | C9   | C8   | 118.7(4) |
| P1               | O10  | Zn2 <sup>3</sup> | 143.0(3)   | O3   | C9   | O2   | 112.4(4) |
| C23              | N5   | N6               | 111.0(4)   | O3   | C9   | C8   | 128.9(5) |
| C17              | N3   | Zn2 <sup>4</sup> | 121.9(3)   | C16  | C14  | C13  | 119.8(4) |
| C17              | N3   | C16              | 118.8(4)   | N3   | C16  | C14  | 122.0(4) |
| C16              | N3   | Zn2 <sup>4</sup> | 119.3(3)   | O1   | C1   | C3   | 116.9(5) |
| N5               | N6   | Zn2              | 112.0(3)   | O1   | C1   | C2   | 122.4(5) |
| C24              | N6   | Zn2              | 132.6(3)   | C3   | C1   | C2   | 120.7(5) |
| C24              | N6   | N5               | 115.4(4)   | C13  | C15  | C17  | 120.0(4) |
| C12              | N2   | N1               | 109.7(4)   | C31  | C30  | C29  | 121.0(5) |
| C19              | N4   | Zn1              | 118.2(3)   | N4   | C19  | C21  | 122.3(4) |
| C19              | N4   | C18              | 118.2(4)   | C8   | C7   | C6   | 122.5(5) |
| C18              | N4   | Zn1              | 122.6(3)   | C30  | C31  | C32  | 120.7(5) |
| P1               | O9   | Zn1              | 140.6(3)   | C5   | C3   | C1   | 117.3(5) |
| N2               | N1   | Zn1              | 111.6(3)   | C5   | C6   | C7   | 118.7(5) |
| C10              | N1   | Zn1              | 130.1(3)   | C5   | C6   | C4   | 116.5(5) |

| Atom | Atom | Atom | Angle/°  | Atom | Atom | Atom | Angle/°  |
|------|------|------|----------|------|------|------|----------|
| C10  | N1   | N2   | 116.7(4) | C4   | C6   | C7   | 124.8(5) |
| C14  | C13  | C12  | 123.1(4) | C18  | C20  | C22  | 119.8(5) |
| C15  | C13  | C12  | 119.6(4) | O8   | C32  | C31  | 120.8(5) |
| C15  | C13  | C14  | 117.3(4) | O8   | C32  | C33  | 119.2(5) |
| O4   | C12  | N2   | 127.7(4) | C31  | C32  | C33  | 120.0(5) |
| O4   | C12  | C13  | 116.4(4) | C34  | C33  | C32  | 118.0(5) |
| N2   | C12  | C13  | 115.9(4) | C4   | C2   | C1   | 119.8(5) |
| C27  | C26  | C24  | 123.4(4) | N4   | C18  | C20  | 122.8(5) |
| C28  | C26  | C27  | 116.7(4) | C2   | C4   | C6   | 121.6(6) |

**Table S5** Comparison of CIH with the previously reported sensors.

| S. No. | Working media                                      | Analyte                             | Detection limit (M)                                                                  | Applications                                 | Reversibility | Ref.      |
|--------|----------------------------------------------------|-------------------------------------|--------------------------------------------------------------------------------------|----------------------------------------------|---------------|-----------|
| 1      | CH <sub>3</sub> OH: H <sub>2</sub> O (9:1, pH 7.4) | Zn <sup>2+</sup> , Cu <sup>2+</sup> | Zn <sup>2+</sup> : $3.21 \times 10^{-8}$<br>Cu <sup>2+</sup> : $2.13 \times 10^{-8}$ | Logic gates, live cell imaging               | Yes           | 5         |
| 2      | CH <sub>3</sub> CN                                 | Zn <sup>2+</sup> , Cu <sup>2+</sup> | Zn <sup>2+</sup> : $2.41 \times 10^{-6}$<br>Cu <sup>2+</sup> : $4.23 \times 10^{-6}$ | Logic gates                                  | Yes           | 6         |
| 3      | THF:H <sub>2</sub> O (5:95)                        | Zn <sup>2+</sup> , Cu <sup>2+</sup> | Zn <sup>2+</sup> : $1.8 \times 10^{-6}$<br>Cu <sup>2+</sup> : $2.3 \times 10^{-7}$   | live cell imaging                            | No            | 7         |
| 4      | DMSO:water (1:1)                                   | Zn <sup>2+</sup> , Cu <sup>2+</sup> | Zn <sup>2+</sup> : $3.5 \times 10^{-8}$<br>Cu <sup>2+</sup> : $1.46 \times 10^{-6}$  | Logic gates, live cell imaging               | Yes           | 8         |
| 5      | DMSO/H <sub>2</sub> O (4:1, v/v)                   | Zn <sup>2+</sup> , Cu <sup>2+</sup> | Zn <sup>2+</sup> : $6.8 \times 10^{-8}$<br>Cu <sup>2+</sup> : $2.3 \times 10^{-8}$   | Logic gates                                  | No            | 9         |
| 6      | HEPES Buffer                                       | Zn <sup>2+</sup> , Cu <sup>2+</sup> | Zn <sup>2+</sup> : $2.29 \times 10^{-9}$<br>Cu <sup>2+</sup> : $3.67 \times 10^{-9}$ | Logic gates, live cell imaging               | Yes           | 10        |
| 7      | HEPES Buffer                                       | Zn <sup>2+</sup> , Cu <sup>2+</sup> | Zn <sup>2+</sup> : $13.2 \times 10^{-9}$<br>Cu <sup>2+</sup> : $4.1 \times 10^{-9}$  | Logic gates, live cell imaging               | No            | 11        |
| 8      | EtOH: H <sub>2</sub> O (1:99)                      | Zn <sup>2+</sup> , Cu <sup>2+</sup> | Zn <sup>2+</sup> : $72 \times 10^{-9}$<br>Cu <sup>2+</sup> : $141 \times 10^{-9}$    | Logic gates, live cell imaging               | Yes           | 12        |
| 9      | DMF:H <sub>2</sub> O (7:3, pH 7.4) HEPES           | Zn <sup>2+</sup> , Cu <sup>2+</sup> | Zn <sup>2+</sup> : $3.49 \times 10^{-9}$<br>Cu <sup>2+</sup> : $5.36 \times 10^{-9}$ | Logic gates, live cell imaging, mitotracking | Yes           | This Work |

## References

- 1 G. L. Long and J. D. Winefordner, *Anal. Chem.*, 2008, **55**, 712A-724A.
- 2 H. A. Benesi and J. H. Hildebrand, *J. Am. Chem. Soc.*, 2002, **71**, 2703–2707.
- 3 K. Nawara and J. Waluk, *Anal. Chem.*, 2017, **89**, 8650–8655.
- 4 K. R. Barqawi, Z. Murtaza and T. J. Meyer, *Calculation of Relative Nonradiative Decay Rate Constants from Emission Spectral Profiles. Polypyridyl Complexes of Ru(II)*, 1991, vol. 95.
- 5 P. Das, S. Singh Rajput, M. Das, S. Laha, I. Choudhuri, N. Bhattacharyya, A. Das, B. Chandra Samanta, M. Mehboob Alam and T. Maity, *J. Photochem. Photobiol. A Chem.*, 2022, **427**, 113817.
- 6 R. Arabahmadi, *J. Photochem. Photobiol. A Chem.*, 2022, **426**, 113762.
- 7 B. Zha, S. Fang, H. Chen, H. Guo and F. Yang, *Spectrochim. Acta, Part A*, 2022, **269**, 120765.
- 8 J. Shree Ganesan, S. Gandhi, K. Radhakrishnan, A. Balasubramaniam, M. Sepperumal and S. Ayyanar, *Spectrochim. Acta, Part A*, 2019, **219**, 33-43
- 9 Y. Sun, W. Ding, J. Li, Y. Jia, G. Guo and Z. Deng, *J. Mol. Struct.*, 2022, **1252**, 132219.
- 10 P. Ghorai, S. Banerjee, D. Nag, S. K. Mukhopadhyay and A. Saha, *J. Lumin.*, 2019, **205**, 197–209.
- 11 P. Wang, S. Xue and X. Yang, *Microchemical Journal*, 2020, **158**, 105147.
- 12 X. He, Q. Xie, J. Fan, C. Xu, W. Xu, Y. Li, F. Ding, H. Deng, H. Chen and J. Shen, *Dyes and Pigments*, 2020, **177**, 108255.
